# Supplementary material for: A new cerium iodate infrared nonlinear optical material with a large second-harmonic generation response
Source: Royal Society of Chemistry journal article supplement (doi:10.1039/c6tc05269j), 2017-01-01
Supplement: c6tc05269j1.pdf [file c6tc05269j1.pdf]

Supplementary information for

**A new cerium iodate infrared nonlinear optical  
material with a large second-harmonic generation  
response**

**Lei Xiao,<sup>†,§</sup> Zhenbo Cao,<sup>‡,\*</sup> Jiyong Yao,<sup>†</sup> Zheshuai Lin,<sup>†</sup> and Zhanggui Hu<sup>†,\*</sup>**

*<sup>†</sup> Center for Crystal Research and Development, Technical Institute of Physics and Chemistry, Chinese Academy of Sciences, Beijing 100190, P.R. China, <sup>‡</sup> Institute of Special Glass Fiber and Optoelectronic Functional Materials, China Building Materials Academy, Beijing 100024, P.R. China, <sup>§</sup> Graduate University of the Chinese Academy of Sciences, Beijing 100049, P.R. China*

---

\*To whom correspondence should be addressed. Email: [czb824@163.com](mailto:czb824@163.com) (Zhenbo Cao) and [hu@mail.ipc.ac.cn](mailto:hu@mail.ipc.ac.cn) (Zhanggui Hu)

**Figure S1.** The superalloy reactor.

**Figure S2.** Millimetric ( $\sim 3 \times 0.3 \times 0.1 \text{ mm}^3$ ) single crystal of  $\text{Ce}_2\text{I}_6\text{O}_{18}$ .

**Figure S3.** Experimental (top) and simulated (bottom) X-ray powder diffraction patterns for  $\text{Ce}_2\text{I}_6\text{O}_{18}$ .

**Figure S4.** Crystal structure of  $\text{Ce}_2\text{I}_6\text{O}_{18}$ .

**Figure S5.** UV-Vis-NIR spectra for  $\text{Ce}_2\text{I}_6\text{O}_{18}$ .

**Figure S6.** DSC study of  $\text{Ce}_2\text{I}_6\text{O}_{18}$ .

**Figure S7.** Part of state density of theoretical calculations (PDOS) of  $\text{Ce}_2\text{I}_6\text{O}_{18}$ .

**Figure S8.** Local density of states (LDOS) of  $\text{Ce}_2\text{I}_6\text{O}_{18}$ .

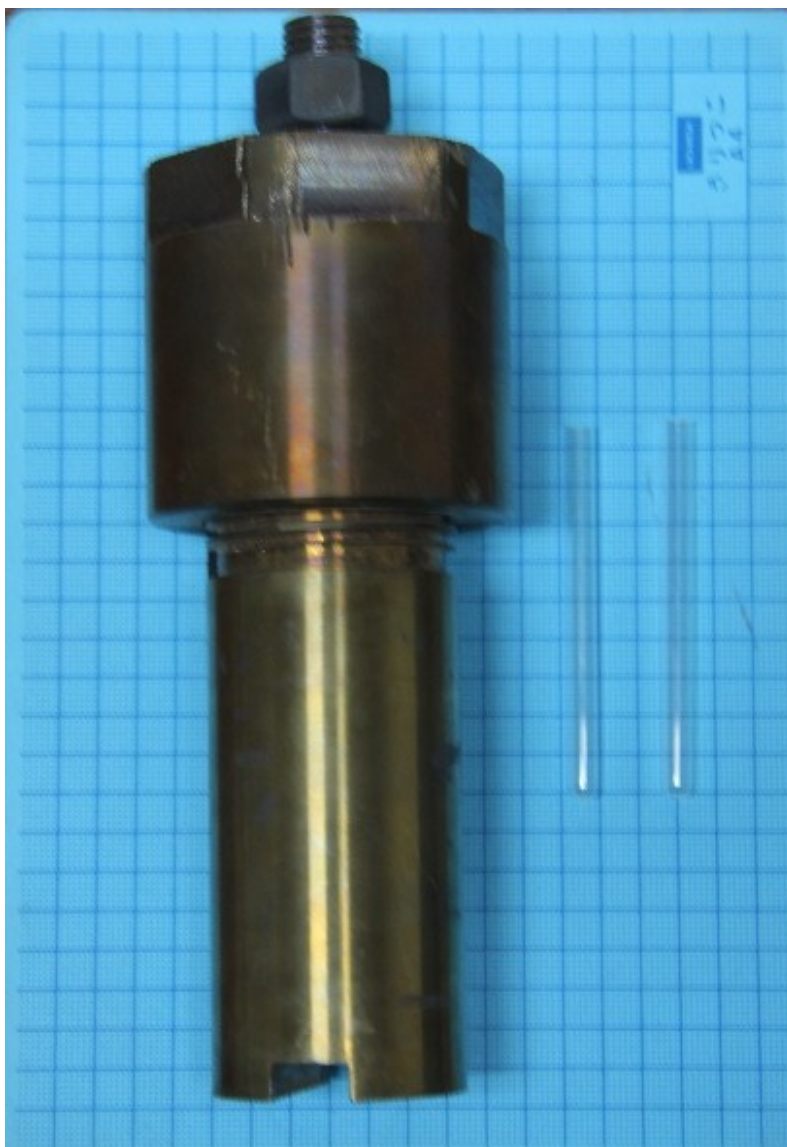

**Figure S1.** The superalloy reactor.

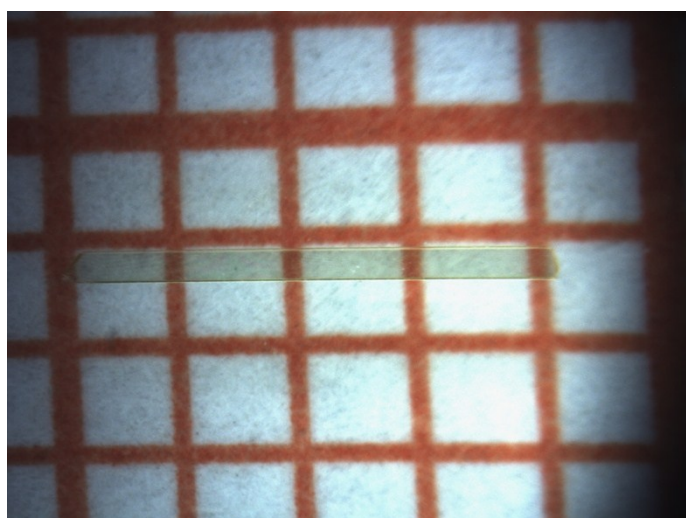

**Figure S2.** Millimetric single crystal of  $\text{Ce}_2\text{I}_6\text{O}_{18}$ .

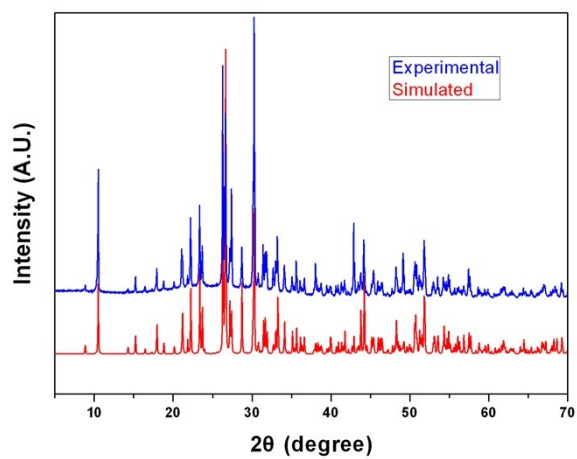

**Figure S3.** Experimental (top) and simulated (bottom) X-ray powder diffraction patterns for  $\text{Ce}_2\text{I}_6\text{O}_{18}$ .

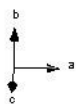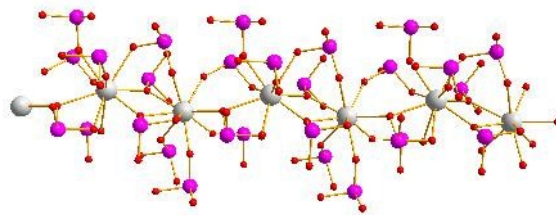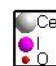

**Figure S4-1.** Crystal structure of  $\text{IO}_3$  and  $\text{IO}_4$  polyhedra viewed down the  $a$ -axis.

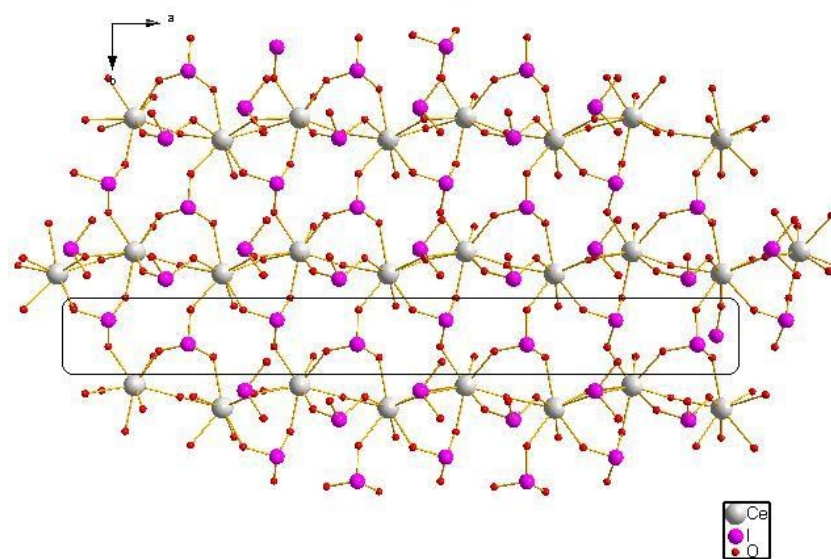

**Figure S4-2.** The one-dimensional chain continues along the b direction by sharing  $\text{IO}_3$  tetrahedral angle.

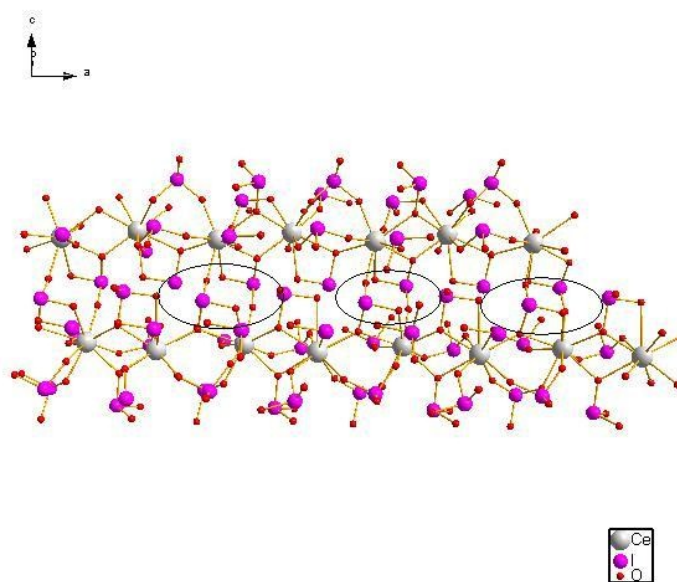

**Figure S4-3.** Crystal structure of  $\text{Ce}_2\text{I}_6\text{O}_{18}$  in the ab plane.

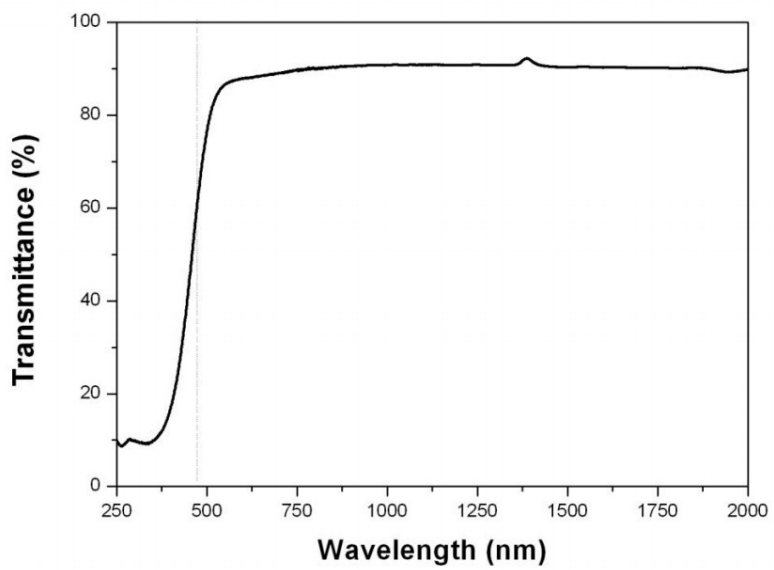

**Figure S5.** UV-Vis-NIR spectra for Ce<sub>2</sub>I<sub>6</sub>O<sub>18</sub>.

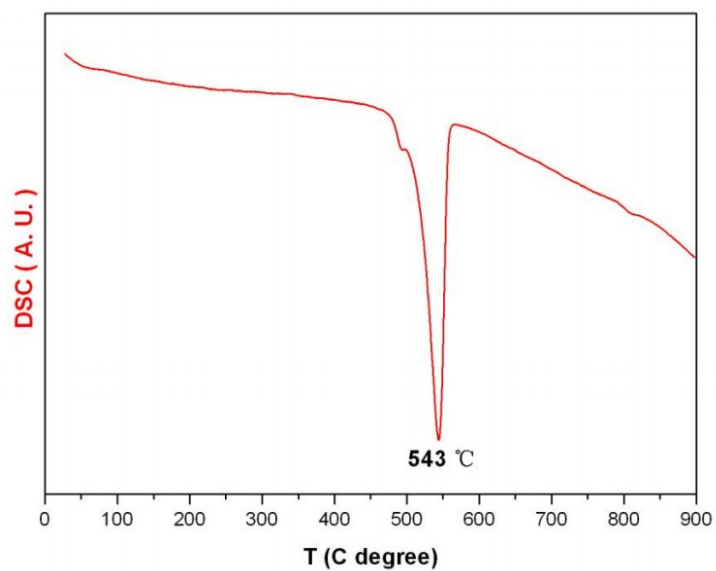

**Figure S6.** DSC study of Ce<sub>2</sub>I<sub>6</sub>O<sub>18</sub>.

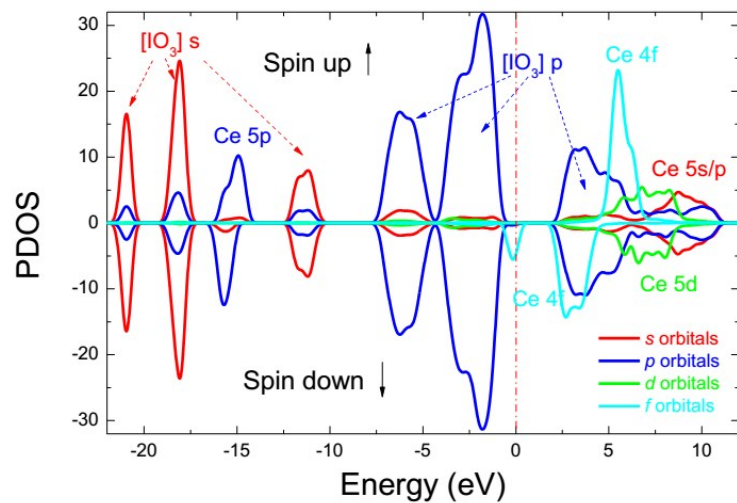

**Figure S7.** Part of state density of theoretical calculations (PDOS) of  $\text{Ce}_2\text{I}_6\text{O}_{18}$ .

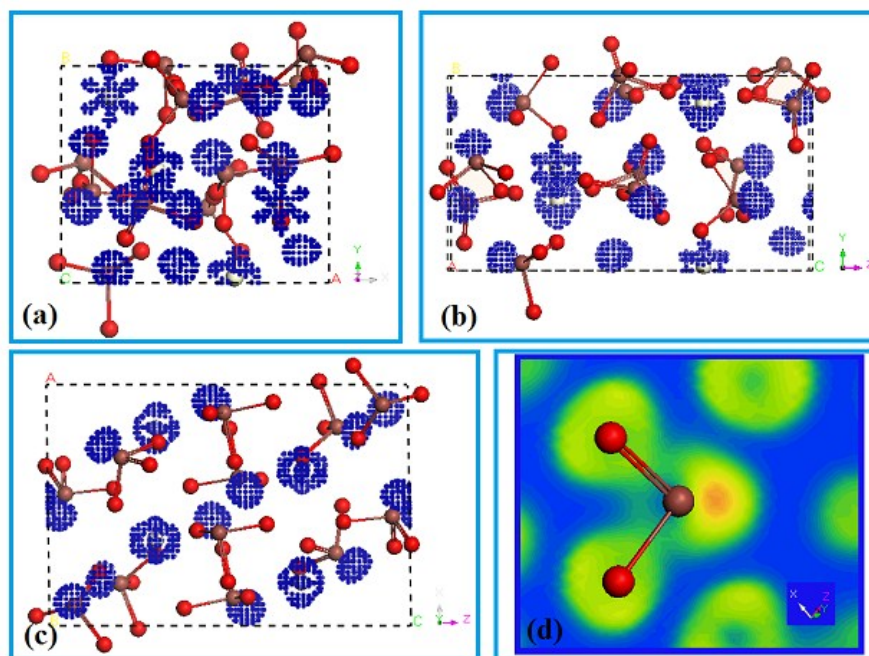

**Figure S8.** Local density of states (LDOS) of  $\text{Ce}_2\text{I}_6\text{O}_{18}$ .
